# Supplementary material
Source: Research Square preprint supplement (doi:10.21203/rs.3.rs-8846573/v1)
Supplement: Supplementary file 1 [file 40408d1a20f54dc6f4155bac.pdf]

**Supplementary Table S1. RNA expression profiles comparing MRI-negative (MRI-) and MRI-positive (MRI+) tumor regions (Pt1–Pt3).**

Columns list per-patient TPMs, per-patient log<sub>2</sub> fold-change (log<sub>2</sub>FC;  $\epsilon = 0.011$ ),  $\Delta\log_{10}(\text{mean}) = \log_{10}(\text{mean}[\text{MRI-}] + \epsilon) - \log_{10}(\text{mean}[\text{MRI+}] + \epsilon)$ , and direction consistency (based on per-patient log<sub>2</sub>FC: 3/3 up, 2/3 up, mixed (including cases with zero log<sub>2</sub>FC in one or more patients), 2/3 up in MRI+, 3/3 up in MRI+). Rows are ordered with IL5RA first, followed by direction consistency (3/3 up → 2/3 up → mixed → 2/3 up in MRI+ → 3/3 up in MRI+) and, within each group, by descending  $|\Delta\log_{10}(\text{mean})|$ . Differential-expression thresholds ( $|\log_2\text{FC}| > 1$  and FDR < 0.05) were applied solely during the initial RNA-seq candidate-selection step and were not used for direction-consistency grouping, which was defined based only on the sign of each per-patient log<sub>2</sub>FC.  $\epsilon$  was added to avoid log of zero. IL5RA was prioritized for validation because of its consistent MRI- upregulation and antibody availability. The complete dataset is also provided as Source Data (Supplementary\_Table\_S1\_full.xlsx).

| Symbol     | Pt1_MRIpos | Pt1_MRIneg | log2FC_Pt1 | Pt2_MRIpos | Pt2_MRIneg | log2FC_Pt2 | Pt3_MRIpos | Pt3_MRIneg | log2FC_Pt3 | Delta_log10_mean | Direction_consistency |
|------------|------------|------------|------------|------------|------------|------------|------------|------------|------------|------------------|-----------------------|
| IL5RA      | 0.0        | 27.3       | 11.28      | 5.1        | 11.1       | 1.13       | 0.0        | 32.2       | 11.51      | 1.14             | 3/3 up in MRI-        |
| PABPC1L2B  | 0.0        | 89.5       | 12.99      | 0.0        | 19.0       | 10.76      | 0.0        | 28.2       | 11.33      | 3.62             | 3/3 up in MRI-        |
| LANCL3     | 0.0        | 60.5       | 12.42      | 0.0        | 31.7       | 11.50      | 0.0        | 28.2       | 11.33      | 3.56             | 3/3 up in MRI-        |
| AC109809.1 | 0.0        | 14.9       | 10.41      | 0.0        | 25.4       | 11.17      | 0.0        | 58.1       | 12.37      | 3.47             | 3/3 up in MRI-        |
| MIR3671    | 0.0        | 34.8       | 11.63      | 0.0        | 25.4       | 11.17      | 0.0        | 31.4       | 11.48      | 3.44             | 3/3 up in MRI-        |
| KLK12      | 0.0        | 23.2       | 11.04      | 24.0       | 787.3      | 5.04       | 0.0        | 33.0       | 11.55      | 1.55             | 3/3 up in MRI-        |
| AC105383.1 | 0.0        | 32.3       | 11.52      | 2.9        | 23.0       | 2.98       | 0.0        | 46.3       | 12.04      | 1.54             | 3/3 up in MRI-        |
| CYP4F8     | 0.0        | 541.7      | 15.59      | 49.4       | 542.0      | 3.46       | 0.0        | 70.6       | 12.65      | 1.37             | 3/3 up in MRI-        |
| HOXA1      | 0.0        | 19.1       | 10.76      | 5.1        | 38.1       | 2.90       | 0.0        | 35.3       | 11.65      | 1.26             | 3/3 up in MRI-        |
| C19orf71   | 0.0        | 6.6        | 9.24       | 4.4        | 58.7       | 3.75       | 0.0        | 13.3       | 10.25      | 1.25             | 3/3 up in MRI-        |
| SMCO3      | 14.5       | 24.0       | 0.73       | 13.8       | 28.6       | 1.05       | 0.0        | 441.7      | 15.29      | 1.24             | 3/3 up in MRI-        |
| DNAH6      | 0.0        | 93.6       | 13.05      | 8.0        | 15.9       | 0.99       | 0.0        | 29.0       | 11.37      | 1.24             | 3/3 up in MRI-        |
| AC005005.3 | 0.0        | 45.6       | 12.02      | 8.0        | 51.6       | 2.69       | 0.0        | 25.1       | 11.16      | 1.18             | 3/3 up in MRI-        |
| AL022341.2 | 0.0        | 53.0       | 12.23      | 10.9       | 44.4       | 2.03       | 0.0        | 35.3       | 11.65      | 1.08             | 3/3 up in MRI-        |
| SPINK13    | 0.0        | 94.4       | 13.07      | 16.7       | 78.6       | 2.23       | 0.0        | 18.8       | 10.74      | 1.06             | 3/3 up in MRI-        |
| AC092070.2 | 0.0        | 45.6       | 12.02      | 10.9       | 19.8       | 0.86       | 0.0        | 55.7       | 12.31      | 1.04             | 3/3 up in MRI-        |
| CA13       | 0.0        | 62.1       | 12.46      | 26.9       | 109.5      | 2.03       | 0.0        | 62.8       | 12.48      | 0.94             | 3/3 up in MRI-        |
| GPR65      | 0.0        | 143.3      | 13.67      | 24.7       | 54.0       | 1.13       | 0.0        | 18.0       | 10.68      | 0.94             | 3/3 up in MRI-        |
| ZNF788P    | 0.0        | 14.9       | 10.41      | 11.6       | 28.6       | 1.30       | 0.0        | 51.0       | 12.18      | 0.91             | 3/3 up in MRI-        |
| MUC13      | 0.0        | 111.0      | 13.30      | 30.5       | 43.6       | 0.52       | 0.0        | 50.2       | 12.16      | 0.83             | 3/3 up in MRI-        |

|            |        |        |       |       |        |       |       |        |       |       |                 |
|------------|--------|--------|-------|-------|--------|-------|-------|--------|-------|-------|-----------------|
| HDHD5-AS1  | 0.0    | 37.3   | 11.73 | 16.0  | 31.7   | 0.99  | 0.0   | 26.7   | 11.24 | 0.78  | 3/3 up in MRI – |
| PTCHD3P1   | 0.0    | 167.3  | 13.89 | 41.4  | 42.1   | 0.02  | 0.0   | 32.2   | 11.51 | 0.77  | 3/3 up in MRI – |
| PBX4       | 0.0    | 50.5   | 12.17 | 26.9  | 27.8   | 0.05  | 0.0   | 74.5   | 12.73 | 0.75  | 3/3 up in MRI – |
| EDARADD    | 0.0    | 163.2  | 13.86 | 69.0  | 189.7  | 1.46  | 0.0   | 22.8   | 11.02 | 0.74  | 3/3 up in MRI – |
| AC100861.1 | 27.3   | 43.9   | 0.68  | 8.7   | 68.3   | 2.97  | 0.0   | 80.0   | 12.83 | 0.73  | 3/3 up in MRI – |
| C9orf129   | 0.0    | 162.3  | 13.85 | 97.4  | 149.2  | 0.62  | 0.0   | 164.0  | 13.86 | 0.69  | 3/3 up in MRI – |
| MOGAT2     | 0.0    | 112.6  | 13.32 | 37.8  | 45.2   | 0.26  | 0.0   | 24.3   | 11.11 | 0.68  | 3/3 up in MRI – |
| LINC02560  | 13.7   | 30.6   | 1.17  | 14.5  | 61.9   | 2.09  | 0.0   | 42.4   | 11.91 | 0.68  | 3/3 up in MRI – |
| AC012291.2 | 0.0    | 24.0   | 11.09 | 19.6  | 41.3   | 1.07  | 0.0   | 25.1   | 11.16 | 0.66  | 3/3 up in MRI – |
| MASTL      | 0.0    | 115.1  | 13.35 | 60.3  | 107.9  | 0.84  | 0.0   | 51.0   | 12.18 | 0.66  | 3/3 up in MRI – |
| ISX        | 0.0    | 57.2   | 12.34 | 26.2  | 39.7   | 0.60  | 0.0   | 18.8   | 10.74 | 0.65  | 3/3 up in MRI – |
| HEXIM2     | 46.6   | 188.0  | 2.01  | 56.7  | 141.3  | 1.32  | 0.0   | 113.0  | 13.33 | 0.63  | 3/3 up in MRI – |
| U73166.1   | 0.0    | 96.1   | 13.09 | 55.9  | 91.3   | 0.71  | 0.0   | 14.1   | 10.33 | 0.56  | 3/3 up in MRI – |
| EXOC3-AS1  | 47.4   | 96.9   | 1.03  | 24.0  | 38.1   | 0.67  | 0.0   | 107.5  | 13.25 | 0.53  | 3/3 up in MRI – |
| AC138150.2 | 47.4   | 132.5  | 1.48  | 60.3  | 110.3  | 0.87  | 0.0   | 76.9   | 12.77 | 0.47  | 3/3 up in MRI – |
| C2CD4B     | 0.0    | 31.5   | 11.48 | 47.2  | 66.7   | 0.50  | 0.0   | 25.9   | 11.20 | 0.42  | 3/3 up in MRI – |
| ZNF350-AS1 | 8.8    | 133.4  | 3.91  | 533.3 | 1208.7 | 1.18  | 0.0   | 25.9   | 11.20 | 0.40  | 3/3 up in MRI – |
| LINC01588  | 83.5   | 119.3  | 0.51  | 0.0   | 60.3   | 12.42 | 0.0   | 30.6   | 11.44 | 0.40  | 3/3 up in MRI – |
| CST2       | 0.0    | 43.9   | 11.96 | 109.0 | 143.6  | 0.40  | 0.0   | 70.6   | 12.65 | 0.37  | 3/3 up in MRI – |
| CAPN10-DT  | 146.2  | 323.9  | 1.15  | 90.8  | 178.6  | 0.98  | 132.0 | 328.0  | 1.31  | 0.35  | 3/3 up in MRI – |
| STK39      | 1265.2 | 1466.1 | 0.21  | 741.8 | 1256.3 | 0.76  | 582.5 | 1819.5 | 1.64  | 0.24  | 3/3 up in MRI – |
| PIK3R3     | 334.2  | 519.3  | 0.64  | 195.4 | 301.6  | 0.63  | 253.5 | 505.3  | 0.99  | 0.23  | 3/3 up in MRI – |
| PPARG      | 0.0    | 39.8   | 11.82 | 27.6  | 29.4   | 0.09  | 55.6  | 62.8   | 0.17  | 0.20  | 3/3 up in MRI – |
| SCML2P1    | 53.0   | 144.9  | 1.45  | 8.7   | 0.0    | -9.63 | 0.0   | 686.5  | 15.93 | 1.13  | 2/3 up in MRI – |
| COL9A1     | 56.2   | 32.3   | -0.80 | 89.4  | 157.9  | 0.82  | 0.0   | 757.1  | 16.07 | 0.81  | 2/3 up in MRI – |
| FAR2P3     | 412.9  | 0.8    | -8.94 | 28.3  | 34.9   | 0.30  | 0.0   | 34.5   | 11.62 | -0.80 | 2/3 up in MRI – |
| RTN4R      | 0.0    | 15.7   | 10.48 | 22.5  | 17.5   | -0.37 | 0.0   | 72.2   | 12.68 | 0.67  | 2/3 up in MRI – |
| NAGS       | 0.0    | 47.2   | 12.07 | 24.0  | 7.9    | -1.59 | 0.0   | 45.5   | 12.01 | 0.62  | 2/3 up in MRI – |

|            |        |       |        |       |       |        |      |       |        |       |                 |
|------------|--------|-------|--------|-------|-------|--------|------|-------|--------|-------|-----------------|
| RPL7P16    | 87.6   | 48.0  | -0.87  | 169.3 | 527.8 | 1.64   | 0.0  | 464.5 | 15.37  | 0.61  | 2/3 up in MRI – |
| AC073869.5 | 763.1  | 110.2 | -2.79  | 14.5  | 35.7  | 1.30   | 0.0  | 47.1  | 12.06  | -0.61 | 2/3 up in MRI – |
| SIRT4      | 0.0    | 12.4  | 10.14  | 18.2  | 5.6   | -1.71  | 0.0  | 51.8  | 12.20  | 0.58  | 2/3 up in MRI – |
| AC100826.1 | 392.8  | 37.3  | -3.40  | 16.7  | 41.3  | 1.30   | 0.0  | 29.0  | 11.37  | -0.58 | 2/3 up in MRI – |
| PCGEM1     | 1351.1 | 77.9  | -4.12  | 33.4  | 92.9  | 1.47   | 0.0  | 218.1 | 14.28  | -0.55 | 2/3 up in MRI – |
| AF129408.1 | 15.3   | 65.4  | 2.10   | 35.6  | 23.8  | -0.58  | 0.0  | 90.2  | 13.00  | 0.55  | 2/3 up in MRI – |
| AC108062.1 | 0.0    | 59.6  | 12.40  | 55.2  | 47.6  | -0.21  | 0.0  | 72.2  | 12.68  | 0.51  | 2/3 up in MRI – |
| AC079322.1 | 0.0    | 43.1  | 11.94  | 42.9  | 27.0  | -0.67  | 0.0  | 65.9  | 12.55  | 0.50  | 2/3 up in MRI – |
| NRIP2      | 0.0    | 72.1  | 12.68  | 115.5 | 100.0 | -0.21  | 0.0  | 193.0 | 14.10  | 0.50  | 2/3 up in MRI – |
| GPRC5D-AS1 | 0.0    | 100.2 | 13.15  | 85.7  | 52.4  | -0.71  | 0.0  | 97.3  | 13.11  | 0.46  | 2/3 up in MRI – |
| AC011611.3 | 0.0    | 58.8  | 12.38  | 47.2  | 42.1  | -0.17  | 0.0  | 33.7  | 11.58  | 0.45  | 2/3 up in MRI – |
| RNU6-1268P | 71.5   | 0.0   | -12.67 | 0.0   | 43.6  | 11.95  | 0.0  | 134.2 | 13.57  | 0.40  | 2/3 up in MRI – |
| AC005064.1 | 171.1  | 0.0   | -13.93 | 0.0   | 39.7  | 11.82  | 0.0  | 34.5  | 11.62  | -0.36 | 2/3 up in MRI – |
| CDHR3      | 0.0    | 65.4  | 12.54  | 48.7  | 0.0   | -12.11 | 0.0  | 37.7  | 11.74  | 0.33  | 2/3 up in MRI – |
| AP002360.3 | 49.8   | 78.7  | 0.66   | 56.7  | 17.5  | -1.70  | 0.0  | 119.3 | 13.40  | 0.31  | 2/3 up in MRI – |
| RBM26-AS1  | 34.5   | 75.4  | 1.13   | 69.0  | 27.0  | -1.35  | 0.0  | 105.1 | 13.22  | 0.30  | 2/3 up in MRI – |
| LRRC25     | 0.0    | 24.0  | 11.09  | 25.4  | 30.2  | 0.25   | 82.9 | 0.0   | -12.88 | -0.30 | 2/3 up in MRI – |
| Z94160.2   | 45.8   | 0.0   | -12.02 | 0.0   | 7.1   | 9.34   | 0.0  | 16.5  | 10.55  | -0.29 | 2/3 up in MRI – |
| FKBP1B     | 24.9   | 55.5  | 1.16   | 118.4 | 80.2  | -0.56  | 1.9  | 129.5 | 6.09   | 0.26  | 2/3 up in MRI – |
| AP001972.2 | 0.0    | 40.6  | 11.85  | 56.7  | 42.9  | -0.40  | 0.0  | 18.8  | 10.74  | 0.26  | 2/3 up in MRI – |
| HYAL3      | 59.4   | 34.0  | -0.81  | 5.8   | 77.8  | 3.74   | 0.0  | 3.9   | 8.48   | 0.25  | 2/3 up in MRI – |
| DGCR9      | 0.0    | 36.4  | 11.69  | 55.9  | 34.1  | -0.71  | 0.0  | 25.1  | 11.16  | 0.23  | 2/3 up in MRI – |
| SUSD5      | 0.0    | 93.6  | 13.05  | 93.0  | 120.6 | 0.38   | 70.7 | 61.2  | -0.21  | 0.23  | 2/3 up in MRI – |
| AL353743.4 | 28.9   | 0.0   | -11.36 | 0.0   | 15.9  | 10.50  | 0.0  | 32.2  | 11.51  | 0.22  | 2/3 up in MRI – |
| CSRNP3     | 20.9   | 103.5 | 2.31   | 100.3 | 60.3  | -0.73  | 0.0  | 29.8  | 11.40  | 0.20  | 2/3 up in MRI – |
| C1orf210   | 166.3  | 151.6 | -0.13  | 71.9  | 76.2  | 0.08   | 0.0  | 153.0 | 13.76  | 0.20  | 2/3 up in MRI – |
| NMB        | 0.0    | 74.5  | 12.73  | 88.6  | 26.2  | -1.76  | 0.0  | 19.6  | 10.80  | 0.13  | 2/3 up in MRI – |
| AC090236.1 | 136.6  | 21.5  | -2.66  | 10.9  | 28.6  | 1.39   | 0.0  | 58.8  | 12.39  | -0.13 | 2/3 up in MRI – |

|            |        |        |        |        |        |       |         |        |        |       |                  |
|------------|--------|--------|--------|--------|--------|-------|---------|--------|--------|-------|------------------|
| PRORS1P    | 0.0    | 48.9   | 12.12  | 16.7   | 67.5   | 2.01  | 245.1   | 88.7   | -1.47  | -0.11 | 2/3 up in MRI-   |
| ZFP92      | 0.0    | 58.8   | 12.38  | 123.5  | 66.7   | -0.89 | 0.0     | 31.4   | 11.48  | 0.10  | 2/3 up in MRI-   |
| LINC00982  | 0.0    | 43.9   | 11.96  | 11.6   | 29.4   | 1.34  | 185.7   | 156.1  | -0.25  | 0.07  | 2/3 up in MRI-   |
| C1orf229   | 0.0    | 72.9   | 12.69  | 20.3   | 33.3   | 0.71  | 74.5    | 0.0    | -12.72 | 0.05  | 2/3 up in MRI-   |
| AC006942.1 | 0.0    | 69.6   | 12.63  | 21.8   | 25.4   | 0.22  | 133.8   | 45.5   | -1.56  | -0.04 | 2/3 up in MRI-   |
| AL021807.1 | 80.3   | 38.1   | -1.08  | 8.7    | 29.4   | 1.75  | 0.0     | 28.2   | 11.33  | 0.03  | 2/3 up in MRI-   |
| XIRP2      | 0.0    | 0.0    | 0.00   | 0.0    | 0.0    | 0.00  | 2103.8  | 0.0    | -17.55 | -4.80 | Mixed/discordant |
| MYL2       | 0.0    | 0.0    | 0.00   | 7.3    | 0.0    | -9.37 | 15282.6 | 0.0    | -20.41 | -5.67 | 2/3 up in MRI+   |
| AC020637.1 | 0.0    | 0.0    | 0.00   | 0.7    | 0.0    | -6.07 | 427.0   | 0.0    | -15.24 | -4.11 | 2/3 up in MRI+   |
| AL135910.1 | 32.1   | 0.0    | -11.51 | 38.5   | 39.7   | 0.04  | 58.4    | 0.0    | -12.38 | -0.51 | 2/3 up in MRI+   |
| ADAMTS7    | 78.7   | 33.1   | -1.25  | 106.8  | 20.6   | -2.37 | 0.0     | 51.8   | 12.20  | -0.24 | 2/3 up in MRI+   |
| AC022075.1 | 161.5  | 39.8   | -2.02  | 14.5   | 10.3   | -0.49 | 0.0     | 217.3  | 14.27  | 0.18  | 2/3 up in MRI+   |
| KDM4A-AS1  | 139.8  | 69.6   | -1.01  | 78.5   | 69.0   | -0.18 | 0.0     | 74.5   | 12.73  | -0.01 | 2/3 up in MRI+   |
| GAPDHP63   | 24.1   | 0.8    | -4.84  | 4.4    | 0.0    | -8.63 | 55.6    | 7.8    | -2.82  | -0.98 | 3/3 up in MRI+   |
| TBX5-AS1   | 25.7   | 0.0    | -11.19 | 55.9   | 16.7   | -1.75 | 66.9    | 0.0    | -12.57 | -0.95 | 3/3 up in MRI+   |
| GRM6       | 54.6   | 22.4   | -1.29  | 18.9   | 0.8    | -4.55 | 85.8    | 0.0    | -12.93 | -0.84 | 3/3 up in MRI+   |
| TERT       | 312.5  | 128.4  | -1.28  | 56.7   | 54.0   | -0.07 | 2161.3  | 426.0  | -2.34  | -0.62 | 3/3 up in MRI+   |
| KIT        | 724.6  | 709.8  | -0.03  | 476.6  | 316.7  | -0.59 | 7251.1  | 1318.9 | -2.46  | -0.56 | 3/3 up in MRI+   |
| PTCH1      | 2009.0 | 1220.1 | -0.72  | 1046.9 | 831.7  | -0.33 | 8214.4  | 2579.7 | -1.67  | -0.39 | 3/3 up in MRI+   |
| IKZF1      | 140.6  | 38.1   | -1.88  | 284.1  | 164.3  | -0.79 | 368.5   | 128.7  | -1.52  | -0.38 | 3/3 up in MRI+   |
| C12orf60   | 725.4  | 516.0  | -0.49  | 4655.7 | 1932.4 | -1.27 | 1676.8  | 644.1  | -1.38  | -0.36 | 3/3 up in MRI+   |
| C3         | 334.2  | 250.1  | -0.42  | 2019.1 | 1977.7 | -0.03 | 2962.5  | 1143.9 | -1.37  | -0.20 | 3/3 up in MRI+   |
