# Supplementary material
Source: Research Square preprint supplement (doi:10.21203/rs.3.rs-8846573/v1)
Supplement: Supplementary file 1 [file b6132a7ea52124eb87f7cfff.xlsx]

## Sheet: Sheet1
Ensembl_ID	Symbol	Pt1_MRIpos	Pt1_MRIneg	log2FC_Pt1	Pt2_MRIpos	Pt2_MRIneg	log2FC_Pt2	Pt3_MRIpos	Pt3_MRIneg	log2FC_Pt3	Delta_log10_mean	Direction_consistency
ENSG00000091181	IL5RA	0	27.3334	11.2795	5.08577	11.1105	1.1257	0	32.1683	11.5144	1.13992	3/3 up in MRI−
ENSG00000184388	PABPC1L2B	0	89.4548	12.9896	0	19.0466	10.7586	0	28.2453	11.3269	3.61751	3/3 up in MRI−
ENSG00000147036	LANCL3	0	60.4648	12.4246	0	31.7444	11.4953	0	28.2453	11.3269	3.56243	3/3 up in MRI−
ENSG00000275995	AC109809.1	0	14.9091	10.4055	0	25.3955	11.1735	0	58.0598	12.3661	3.47447	3/3 up in MRI−
ENSG00000265996	MIR3671	0	34.788	11.6273	0	25.3955	11.1735	0	31.3837	11.4788	3.44338	3/3 up in MRI−
ENSG00000186474	KLK12	0	23.192	11.0426	23.9758	787.261	5.03655	0	32.9529	11.5492	1.54568	3/3 up in MRI−
ENSG00000250241	AC105383.1	0	32.3031	11.5204	2.90615	23.0147	2.98061	0	46.2909	12.0394	1.53885	3/3 up in MRI−
ENSG00000186526	CYP4F8	0	541.698	15.5877	49.4046	542.035	3.45538	0	70.6133	12.6484	1.36829	3/3 up in MRI−
ENSG00000105991	HOXA1	0	19.0506	10.7589	5.08577	38.0933	2.9023	0	35.3066	11.6487	1.2569	3/3 up in MRI−
ENSG00000183397	C19orf71	0	6.62628	9.23694	4.35923	58.7271	3.74852	0	13.3381	10.245	1.25342	3/3 up in MRI−
ENSG00000179256	SMCO3	14.4594	24.0203	0.73181	13.8042	28.57	1.04879	0	441.725	15.2934	1.2423	3/3 up in MRI−
ENSG00000115423	DNAH6	0	93.5962	13.0549	7.99192	15.8722	0.988902	0	29.0299	11.3664	1.23711	3/3 up in MRI−
ENSG00000273387	AC005005.3	0	45.5557	12.0163	7.99192	51.5846	2.68865	0	25.1069	11.157	1.18292	3/3 up in MRI−
ENSG00000262528	AL022341.2	0	53.0102	12.2349	10.8981	44.4421	2.02676	0	35.3066	11.6487	1.08451	3/3 up in MRI−
ENSG00000214510	SPINK13	0	94.4245	13.0676	16.7104	78.5674	2.23244	0	18.8302	10.7422	1.05913	3/3 up in MRI−
ENSG00000269001	AC092070.2	0	45.5557	12.0163	10.8981	19.8402	0.8637	0	55.706	12.3064	1.04461	3/3 up in MRI−
ENSG00000185015	CA13	0	62.1214	12.4636	26.8819	109.518	2.02602	0	62.7673	12.4785	0.940038	3/3 up in MRI−
ENSG00000140030	GPR65	0	143.293	13.6693	24.7023	53.9655	1.12704	0	18.0456	10.6808	0.939802	3/3 up in MRI−
ENSG00000214189	ZNF788P	0	14.9091	10.4055	11.6246	28.57	1.29651	0	50.9985	12.179	0.908871	3/3 up in MRI−
ENSG00000173702	MUC13	0	110.99	13.3008	30.5146	43.6485	0.516276	0	50.2139	12.1567	0.826534	3/3 up in MRI−
ENSG00000185837	HDHD5-AS1	0	37.2728	11.7268	15.9838	31.7444	0.989394	0	26.6761	11.2444	0.776454	3/3 up in MRI−
ENSG00000274985	PTCHD3P1	0	167.314	13.8929	41.4127	42.0613	0.0224151	0	32.1683	11.5144	0.765575	3/3 up in MRI−
ENSG00000105717	PBX4	0	50.5254	12.1656	26.8819	27.7763	0.0472012	0	74.5362	12.7264	0.754332	3/3 up in MRI−
ENSG00000186197	EDARADD	0	163.172	13.8567	69.0212	189.673	1.45826	0	22.7532	11.015	0.735572	3/3 up in MRI−
ENSG00000246582	AC100861.1	27.3122	43.8991	0.684429	8.71846	68.2504	2.96711	0	80.0284	12.829	0.726709	3/3 up in MRI−
ENSG00000204352	C9orf129	0	162.344	13.8494	97.3562	149.199	0.615834	0	163.98	13.8638	0.68869	3/3 up in MRI−
ENSG00000166391	MOGAT2	0	112.647	13.3222	37.78	45.2358	0.259772	0	24.3223	11.1112	0.682997	3/3 up in MRI−
ENSG00000268307	LINC02560	13.6561	30.6465	1.16554	14.5308	61.9016	2.09003	0	42.368	11.9116	0.679615	3/3 up in MRI−
ENSG00000285667	AC012291.2	0	24.0203	11.0932	19.6165	41.2677	1.07252	0	25.1069	11.157	0.66295	3/3 up in MRI−
ENSG00000120539	MASTL	0	115.132	13.3536	60.3027	107.931	0.839698	0	50.9985	12.179	0.657325	3/3 up in MRI−
ENSG00000175329	ISX	0	57.1517	12.3434	26.1554	39.6805	0.601115	0	18.8302	10.7422	0.645207	3/3 up in MRI−
ENSG00000168517	HEXIM2	46.5913	188.021	2.0125	56.67	141.263	1.31755	0	112.981	13.3264	0.631638	3/3 up in MRI−
ENSG00000230454	U73166.1	0	96.0811	13.0927	55.9435	91.2651	0.705984	0	14.1227	10.3274	0.556274	3/3 up in MRI−
ENSG00000221990	EXOC3-AS1	47.3946	96.9093	1.03174	23.9758	38.0933	0.667714	0	107.489	13.2545	0.531037	3/3 up in MRI−
ENSG00000267288	AC138150.2	47.3946	132.526	1.48326	60.3027	110.312	0.871173	0	76.89	12.7713	0.472487	3/3 up in MRI−
ENSG00000205502	C2CD4B	0	31.4748	11.483	47.225	66.6632	0.497242	0	25.8915	11.2014	0.419165	3/3 up in MRI−
ENSG00000269235	ZNF350-AS1	8.83628	133.354	3.914	533.279	1208.67	1.18044	0	25.8915	11.2014	0.401951	3/3 up in MRI−
ENSG00000214900	LINC01588	83.5431	119.273	0.513619	0	60.3143	12.421	0	30.5991	11.4423	0.400591	3/3 up in MRI−
ENSG00000170369	CST2	0	43.8991	11.9628	108.981	143.643	0.398383	0	70.6133	12.6484	0.374456	3/3 up in MRI−
ENSG00000260942	CAPN10-DT	146.2	323.859	1.14736	90.8173	178.562	0.975302	131.958	327.959	1.31337	0.352258	3/3 up in MRI−
ENSG00000198648	STK39	1265.2	1466.06	0.212587	741.796	1256.28	0.76006	582.499	1819.47	1.64317	0.244013	3/3 up in MRI−
ENSG00000117461	PIK3R3	334.172	519.335	0.636056	195.439	301.572	0.625755	253.547	505.277	0.994788	0.228746	3/3 up in MRI−
ENSG00000132170	PPARG	0	39.7577	11.8199	27.6085	29.3636	0.0888821	55.6108	62.7673	0.174617	0.19992	3/3 up in MRI−
ENSG00000264127	SCML2P1	53.0177	144.95	1.45082	8.71846	0	-9.63225	0	686.518	15.9295	1.12909	2/3 up in MRI−
ENSG00000112280	COL9A1	56.2309	32.3031	-0.799481	89.3642	157.928	0.821424	0	757.131	16.0708	0.813286	2/3 up in MRI−
ENSG00000240253	FAR2P3	412.895	0.828285	-8.94244	28.335	34.9188	0.301314	0	34.522	11.6163	-0.797729	2/3 up in MRI−
ENSG00000040608	RTN4R	0	15.7374	10.4835	22.5227	17.4594	-0.36717	0	72.1824	12.6801	0.669635	2/3 up in MRI−
ENSG00000161653	NAGS	0	47.2122	12.0678	23.9758	7.9361	-1.59374	0	45.5063	12.0147	0.622606	2/3 up in MRI−
ENSG00000242899	RPL7P16	87.5595	48.0405	-0.865863	169.283	527.751	1.64035	0	464.478	15.3659	0.607436	2/3 up in MRI−
ENSG00000283303	AC073869.5	763.134	110.162	-2.79219	14.5308	35.7124	1.29667	0	47.0755	12.0636	-0.605292	2/3 up in MRI−
ENSG00000089163	SIRT4	0	12.4243	10.1427	18.1635	5.55527	-1.70713	0	51.7831	12.2011	0.583841	2/3 up in MRI−
ENSG00000259457	AC100826.1	392.813	37.2728	-3.39726	16.7104	41.2677	1.3037	0	29.0299	11.3664	-0.580488	2/3 up in MRI−
ENSG00000227418	PCGEM1	1351.15	77.8588	-4.11699	33.4208	92.8523	1.47389	0	218.116	14.2754	-0.551531	2/3 up in MRI−
ENSG00000272991	AF129408.1	15.2627	65.4345	2.09925	35.6004	23.8083	-0.580208	0	90.228	13.002	0.54739	2/3 up in MRI−
ENSG00000251432	AC108062.1	0	59.6365	12.4047	55.2169	47.6166	-0.213601	0	72.1824	12.6801	0.511657	2/3 up in MRI−
ENSG00000261187	AC079322.1	0	43.0708	11.9354	42.8658	26.9827	-0.667572	0	65.9057	12.5489	0.501069	2/3 up in MRI−
ENSG00000053702	NRIP2	0	72.0608	12.6777	115.52	99.9948	-0.208191	0	193.01	14.099	0.49963	2/3 up in MRI−
ENSG00000247498	GPRC5D-AS1	0	100.222	13.1536	85.7315	52.3782	-0.710741	0	97.2894	13.1107	0.464499	2/3 up in MRI−
ENSG00000257453	AC011611.3	0	58.8082	12.3846	47.225	42.0613	-0.167016	0	33.7374	11.5831	0.454699	2/3 up in MRI−
ENSG00000212516	RNU6-1268P	71.4936	0	-12.6663	0	43.6485	11.9546	0	134.165	13.5743	0.395578	2/3 up in MRI−
ENSG00000234715	AC005064.1	171.103	0	-13.9252	0	39.6805	11.8171	0	34.522	11.6163	-0.362729	2/3 up in MRI−
ENSG00000128536	CDHR3	0	65.4345	12.5386	48.6781	0	-12.1119	0	37.6604	11.7418	0.325748	2/3 up in MRI−
ENSG00000272301	AP002360.3	49.8045	78.6871	0.659733	56.67	17.4594	-1.69795	0	119.258	13.4044	0.305941	2/3 up in MRI−
ENSG00000227354	RBM26-AS1	34.5418	75.3739	1.12547	69.0212	26.9827	-1.35464	0	105.135	13.2226	0.301727	2/3 up in MRI−
ENSG00000175489	LRRC25	0	24.0203	11.0932	25.4288	30.1572	0.245937	82.9449	0	-12.8806	-0.300973	2/3 up in MRI−
ENSG00000272694	Z94160.2	45.788	0	-12.0236	0	7.14249	9.345	0	16.4764	10.5496	-0.287198	2/3 up in MRI−
ENSG00000119782	FKBP1B	24.9023	55.4951	1.15573	118.426	80.1546	-0.563062	1.88511	129.458	6.09342	0.261371	2/3 up in MRI−
ENSG00000254963	AP001972.2	0	40.586	11.8497	56.67	42.8549	-0.403034	0	18.8302	10.7422	0.256287	2/3 up in MRI−
ENSG00000186792	HYAL3	59.4441	33.9597	-0.80751	5.81231	77.7738	3.73958	0	3.92296	8.48233	0.248451	2/3 up in MRI−
ENSG00000273032	DGCR9	0	36.4445	11.6944	55.9435	34.1252	-0.71295	0	25.1069	11.157	0.23295	2/3 up in MRI−
ENSG00000173705	SUSD5	0	93.5962	13.0549	92.9969	120.629	0.375279	70.6917	61.1982	-0.208017	0.225946	2/3 up in MRI−
ENSG00000234424	AL353743.4	28.9188	0	-11.3608	0	15.8722	10.4958	0	32.1683	11.5144	0.220231	2/3 up in MRI−
ENSG00000178662	CSRNP3	20.8858	103.536	2.30893	100.262	60.3143	-0.733102	0	29.8145	11.4048	0.203689	2/3 up in MRI−
ENSG00000253313	C1orf210	166.283	151.576	-0.133587	71.9273	76.1865	0.0829841	0	152.995	13.7638	0.203666	2/3 up in MRI−
ENSG00000197696	NMB	0	74.5456	12.7266	88.6377	26.1891	-1.75853	0	19.6148	10.801	0.132783	2/3 up in MRI−
ENSG00000267396	AC090236.1	136.561	21.5354	-2.66414	10.8981	28.57	1.38952	0	58.8444	12.3855	-0.13141	2/3 up in MRI−
ENSG00000162997	PRORSD1P	0	48.8688	12.1175	16.7104	67.4568	2.01251	245.064	88.6589	-1.46671	-0.106192	2/3 up in MRI−
ENSG00000189420	ZFP92	0	58.8082	12.3846	123.512	66.6632	-0.889573	0	31.3837	11.4788	0.103766	2/3 up in MRI−
ENSG00000177133	LINC00982	0	43.8991	11.9628	11.6246	29.3636	1.33602	185.683	156.134	-0.250047	0.0654316	2/3 up in MRI−
ENSG00000221953	C1orf229	0	72.8891	12.6942	20.3431	33.3316	0.712049	74.4619	0	-12.725	0.0493618	2/3 up in MRI−
ENSG00000269194	AC006942.1	0	69.5759	12.6271	21.7962	25.3955	0.220397	133.843	45.5063	-1.55617	-0.044501	2/3 up in MRI−
ENSG00000272468	AL021807.1	80.3299	38.1011	-1.07588	8.71846	29.3636	1.7506	0	28.2453	11.3269	0.0313202	2/3 up in MRI−
ENSG00000163092	XIRP2	0	0	0	0	0	0	2103.78	0	-17.5451	-4.80449	Mixed/discordant
ENSG00000111245	MYL2	0	0	0	7.26539	0	-9.36957	15282.6	0	-20.406	-5.66589	2/3 up in MRI+
ENSG00000258231	AC020637.1	0	0	0	0.726539	0	-6.06714	426.978	0	-15.2444	-4.11266	2/3 up in MRI+
ENSG00000272848	AL135910.1	32.1319	0	-11.5128	38.5065	39.6805	0.0433141	58.4384	0	-12.3755	-0.512022	2/3 up in MRI+
ENSG00000136378	ADAMTS7	78.7233	33.1314	-1.24831	106.801	20.6339	-2.37122	0	51.7831	12.2011	-0.244891	2/3 up in MRI+
ENSG00000245648	AC022075.1	161.463	39.7577	-2.0216	14.5308	10.3169	-0.493652	0	217.332	14.2702	0.181647	2/3 up in MRI+
ENSG00000236200	KDM4A-AS1	139.774	69.5759	-1.00632	78.4662	69.0441	-0.184526	0	74.5362	12.7264	-0.0102351	2/3 up in MRI+
ENSG00000218582	GAPDHP63	24.099	0.828285	-4.84432	4.35923	0	-8.63406	55.6108	7.84592	-2.82361	-0.984928	3/3 up in MRI+
ENSG00000255399	TBX5-AS1	25.7056	0	-11.191	55.9435	16.6658	-1.74641	66.9215	0	-12.571	-0.949344	3/3 up in MRI+
ENSG00000113262	GRM6	54.6243	22.3637	-1.28797	18.89	0.79361	-4.55403	85.7726	0	-12.929	-0.836963	3/3 up in MRI+
ENSG00000164362	TERT	312.483	128.384	-1.28324	56.67	53.9655	-0.0705348	2161.28	426.033	-2.34282	-0.619	3/3 up in MRI+
ENSG00000157404	KIT	724.575	709.84	-0.0296409	476.609	316.65	-0.5899	7251.08	1318.9	-2.45885	-0.556754	3/3 up in MRI+
ENSG00000185920	PTCH1	2009.05	1220.06	-0.719552	1046.94	831.703	-0.332037	8214.37	2579.74	-1.67092	-0.386214	3/3 up in MRI+
ENSG00000185811	IKZF1	140.577	38.1011	-1.88315	284.077	164.277	-0.790107	368.539	128.673	-1.51803	-0.379458	3/3 up in MRI+
ENSG00000182993	C12orf60	725.379	516.022	-0.491294	4655.66	1932.44	-1.26856	1676.81	644.15	-1.38023	-0.358344	3/3 up in MRI+
ENSG00000125730	C3	334.172	250.142	-0.417828	2019.05	1977.68	-0.0298711	2962.45	1143.93	-1.37278	-0.197701	3/3 up in MRI+
